# Supplementary material for: Taxa-function robustness in microbial communities
Source: PubMed Central journal article supplement (PMC5833107; doi:10.1186/s40168-018-0425-4), 2018-03-02

Gene distribution feature

Average functional redundancy

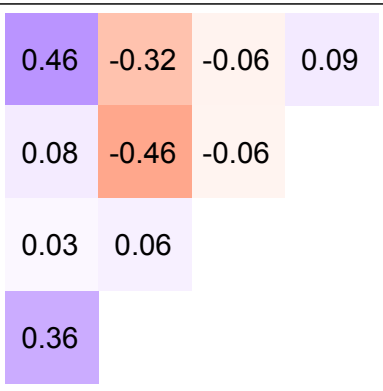

Average functional similarity

Unique pathway abundance

Genome size variability

Average genome size

Genome size variability

Unique pathway abundance

Average functional similarity

Gene distribution feature

Pearson correlation

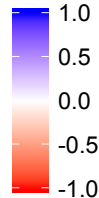

Supplement: 40168_2018_425_MOESM8_ESM.pdf [file 40168_2018_425_MOESM8_ESM.pdf]
