# Supplementary material for: Taxa-function robustness in microbial communities
Source: PubMed Central journal article supplement (PMC5833107; doi:10.1186/s40168-018-0425-4), 2018-03-02

A

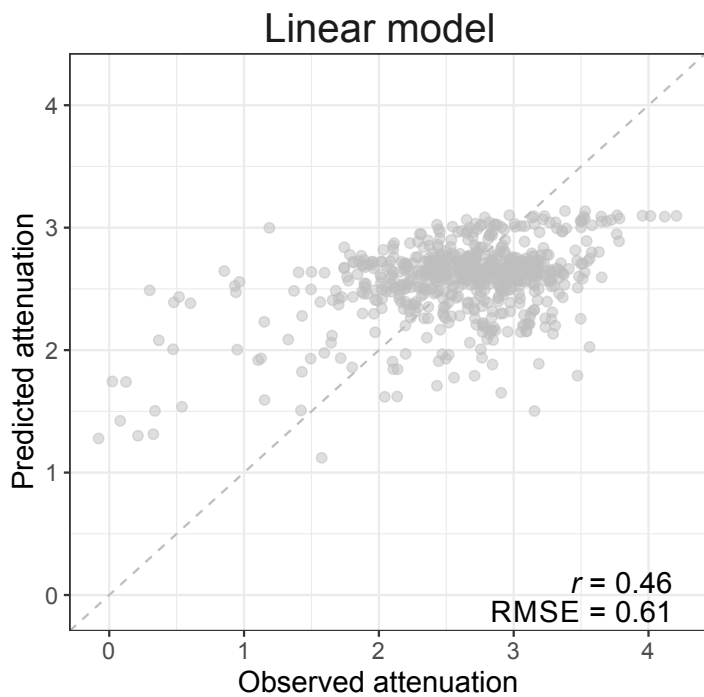

B

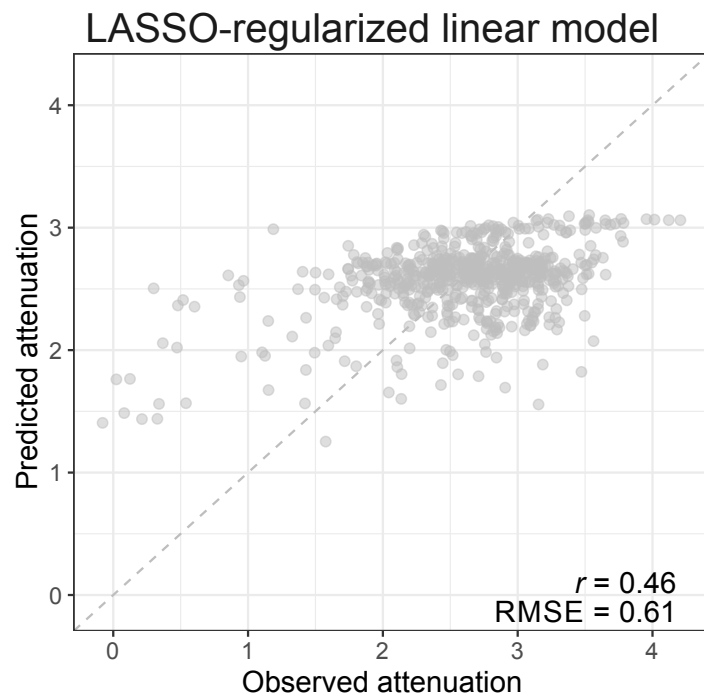

C

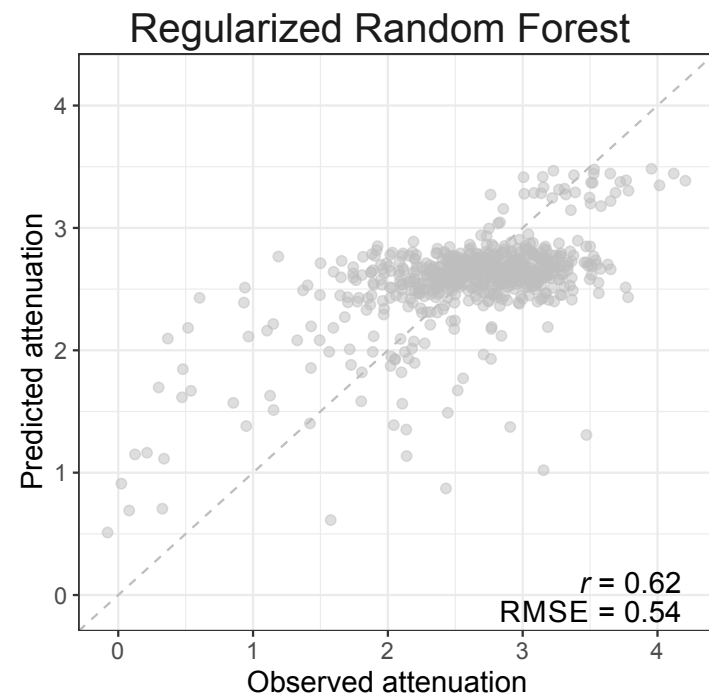

D

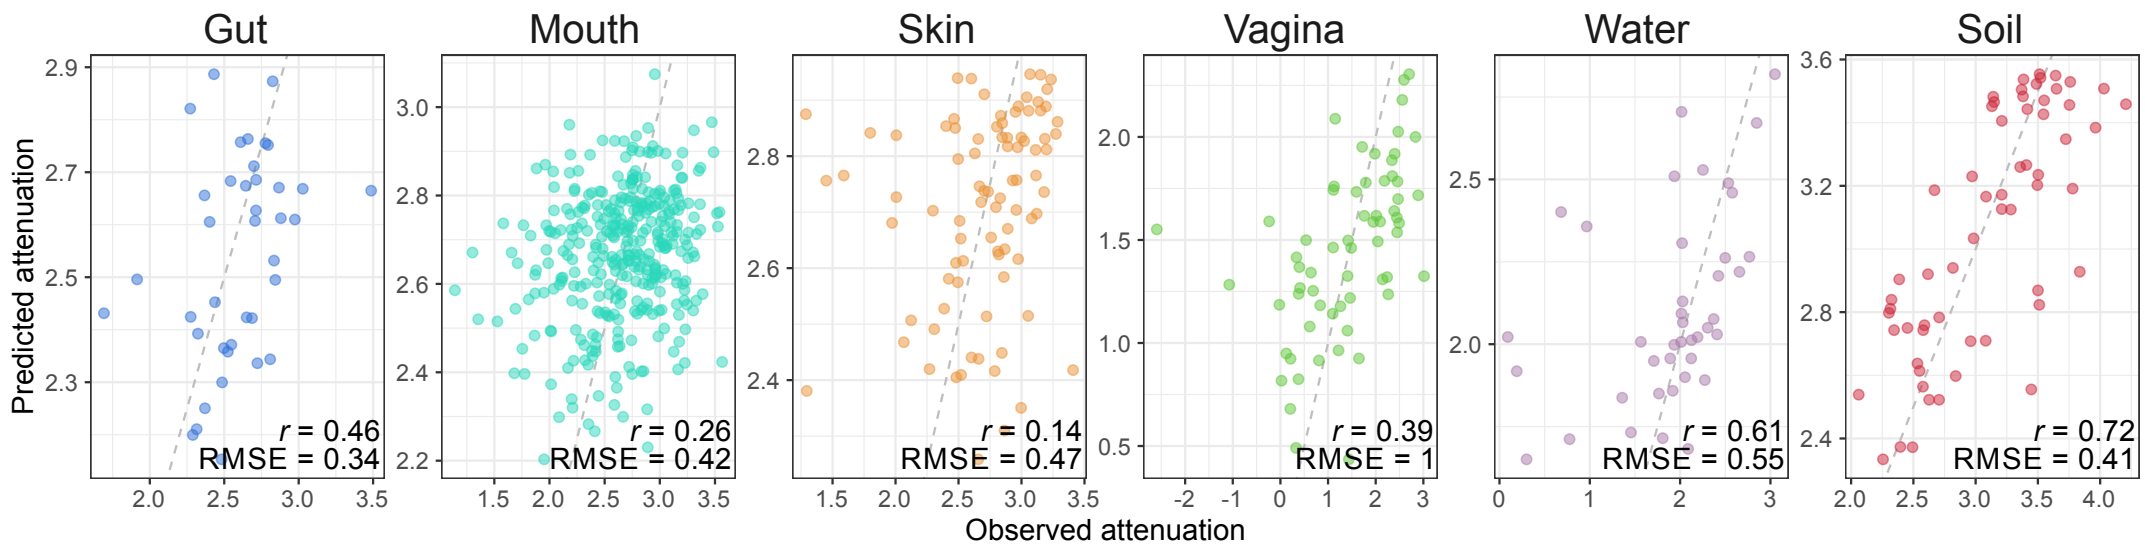

Supplement: 40168_2018_425_MOESM11_ESM.pdf [file 40168_2018_425_MOESM11_ESM.pdf]
